# Supplementary material
Source: MDPI journal article supplement (https://www.mdpi.com/2072-4292/16/1/205)
Supplement: s1 [file s1 › remotesensing-2723561-supplementary.pdf]

Supplementary Files for Online Publication Only

Typhoon-Induced Extreme Sea Surface Temperature Drops in the Western

North Pacific and the Impact of Extra Cooling Due to Precipitation

Jia-Yi Lin <sup>1</sup>, Hua Ho <sup>1</sup>, Zhe-Wen Zheng <sup>1,\*</sup>, Yung-Cheng Tseng <sup>1,2</sup> and Da-Guang Lu <sup>1,2</sup>

<sup>1</sup> Department of Earth Science, National Taiwan Normal University, Taipei 11677, Taiwan

<sup>2</sup> Department of Earth and Life Science, University of Taipei, Taipei 10048, Taiwan

\* Correspondence: zwz@ntnu.edu.tw

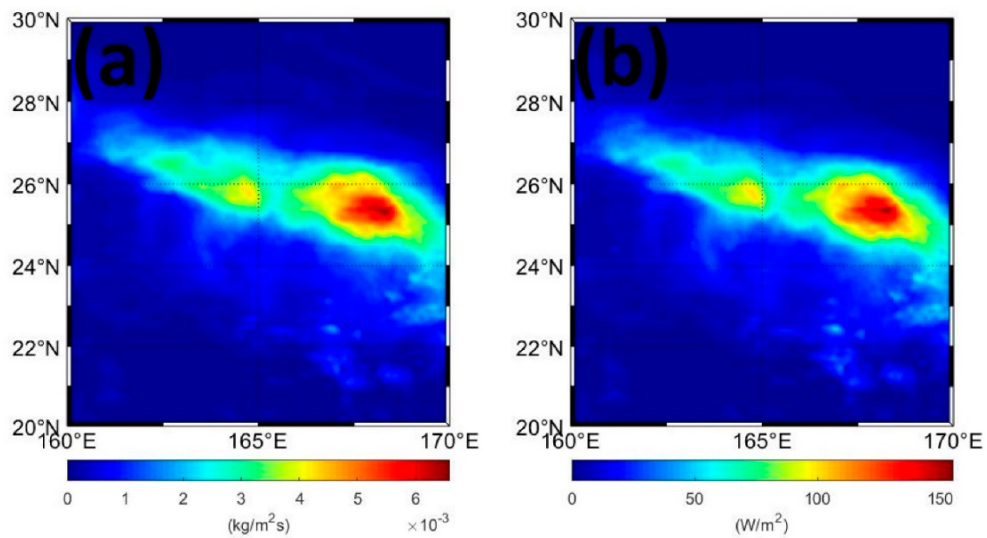

**Figure S1.** (a) Maximum daily accumulated precipitation along Kilo's track. (b) Oceanic precipitation sensible heat flux ( $Q_p$ ) along Kilo's track.

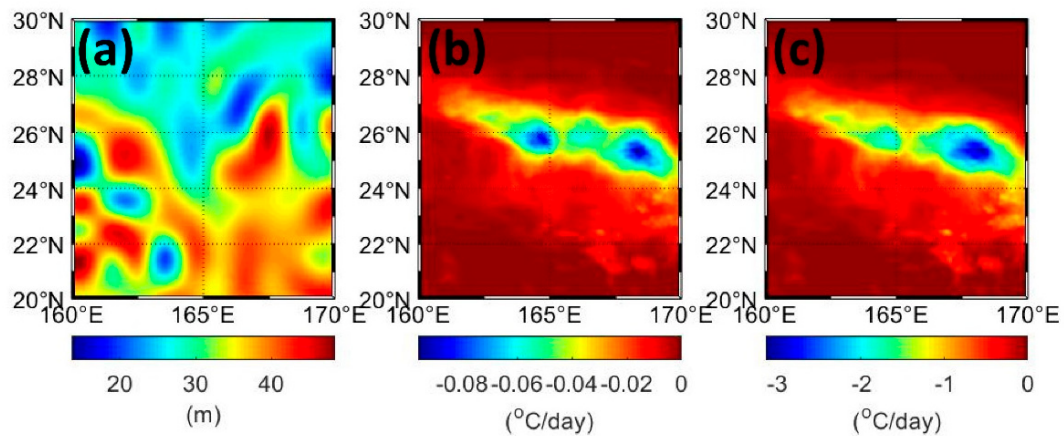

**Figure S2.** (a) Argo mixed layer climatological mixed layer depth for September. (b)  $\Delta T$  with  $H$ =climatological mixed layer depth. (c)  $\Delta T$  with  $H$ =1m.
